# Supplementary material for: First-principles study of the temperature-induced band renormalization in thermoelectric filled skutterudites
Source: Royal Society of Chemistry journal article supplement (doi:10.1039/d3cp03596d), 2023-01-01
Supplement: d3cp03596d1.pdf [file d3cp03596d1.pdf]

## Electronic Supplementary Information

### First-principles study of the temperature-induced band renormalization in thermoelectric filled skutterudites

Jinyan Ning<sup>1,†</sup>, Wenxin Lei<sup>1,†</sup>, Jiong Yang<sup>1,2,\*</sup>, and Jinyang Xi<sup>1,2,\*</sup>

<sup>1</sup>Materials Genome Institute, Shanghai University, Shanghai 200444, China.

<sup>2</sup>Zhejiang Laboratory, Hangzhou, Zhejiang 311100, China.

#### Corresponding Authors:

\*Jiong Yang, Email: [jiongy@t.shu.edu.cn](mailto:jiongy@t.shu.edu.cn)

\*Jinyang Xi, Email: [jinyangxi@t.shu.edu.cn](mailto:jinyangxi@t.shu.edu.cn)

†The authors contributed equally

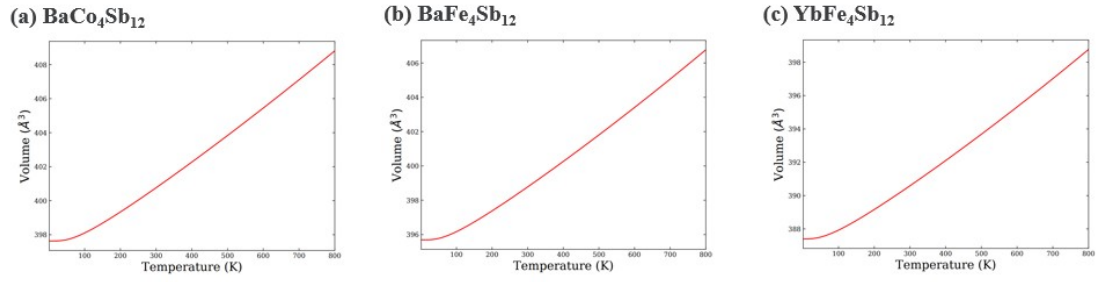

**Fig. S1** Volume–temperature relations of (a)  $\text{BaCo}_4\text{Sb}_{12}$ , (b)  $\text{BaFe}_4\text{Sb}_{12}$  and (c)  $\text{YbFe}_4\text{Sb}_{12}$ , respectively.

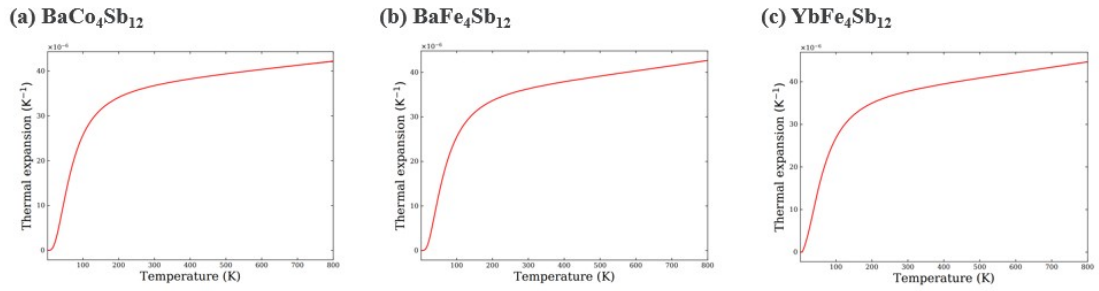

**Fig. S2** Volumetric thermal-expansion-coefficient–temperature relations of (a)  $\text{BaCo}_4\text{Sb}_{12}$ , (b)  $\text{BaFe}_4\text{Sb}_{12}$  and (c)  $\text{YbFe}_4\text{Sb}_{12}$ , respectively.

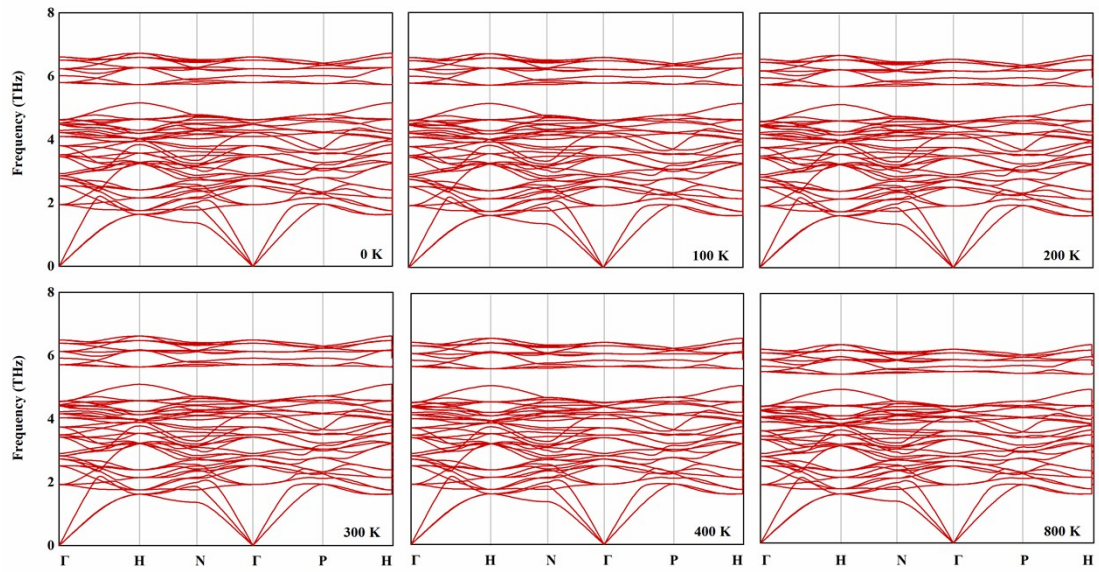

**Fig. S3** Phonon spectra with the lattice parameters at different temperatures for  $\text{BaCo}_4\text{Sb}_{12}$ .

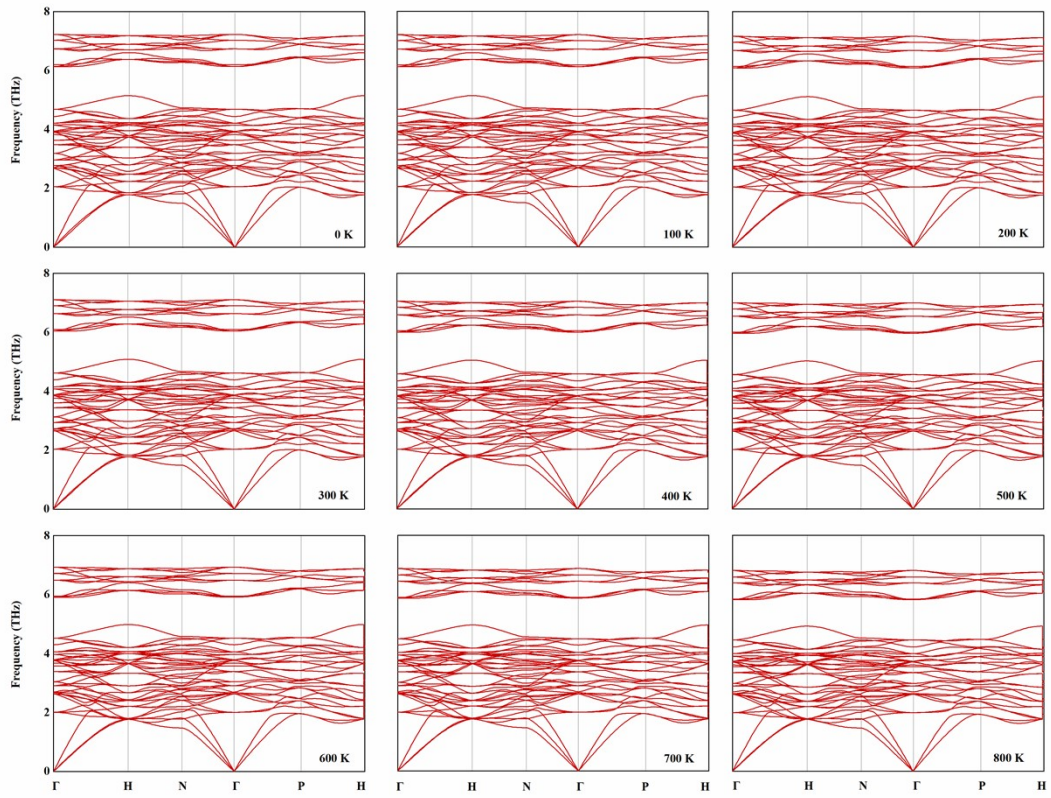

**Fig. S4** Phonon spectra with the lattice parameters at different temperatures for  $\text{BaFe}_4\text{Sb}_{12}$ .

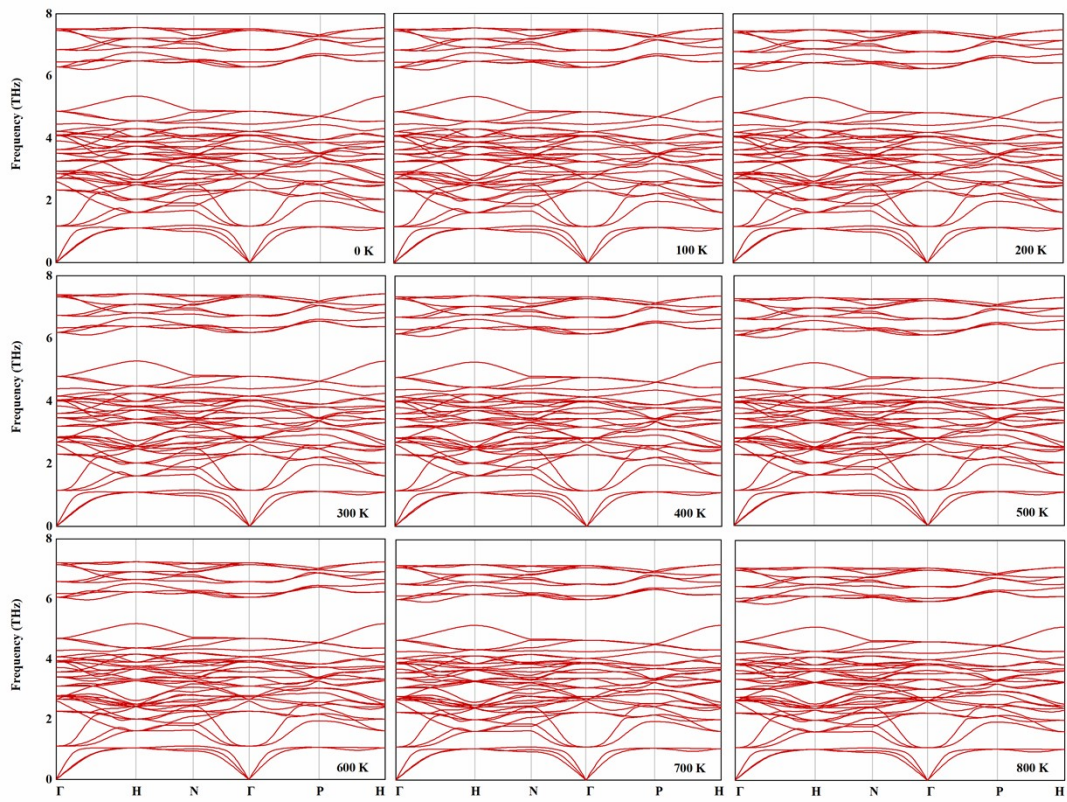

**Fig. S5** Phonon spectra with the lattice parameters at different temperatures for  $\text{YbFe}_4\text{Sb}_{12}$ .



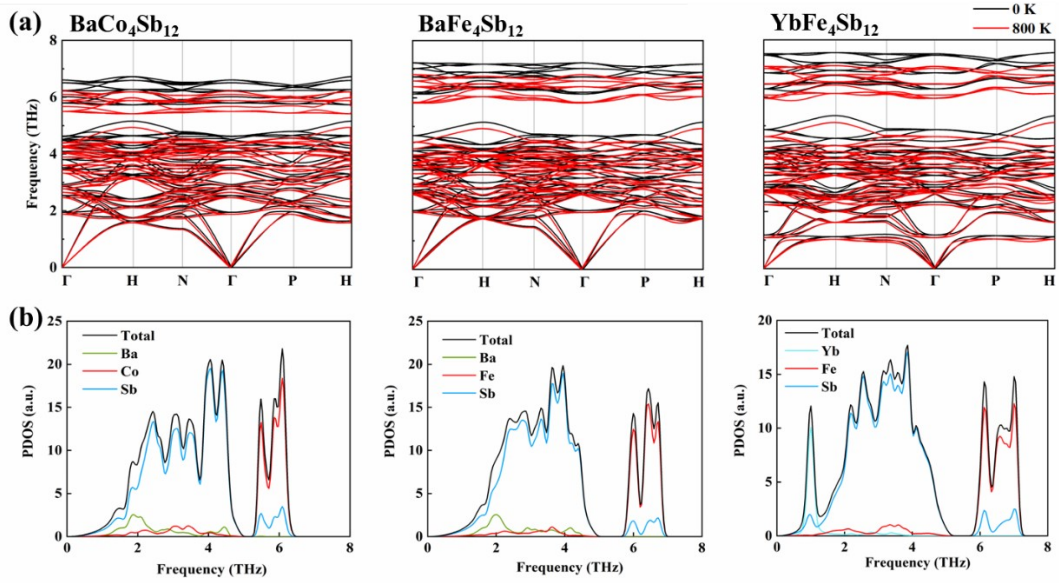

**Fig. S6** (a) Phonon spectra with the lattice parameters at 0 K and 800 K for  $\text{BaCo}_4\text{Sb}_{12}$ ,  $\text{BaFe}_4\text{Sb}_{12}$  and  $\text{YbFe}_4\text{Sb}_{12}$ , respectively. (b) Phonon density of states (DOS) with the lattice parameters at 800 K for  $\text{BaCo}_4\text{Sb}_{12}$ ,  $\text{BaFe}_4\text{Sb}_{12}$  and  $\text{YbFe}_4\text{Sb}_{12}$ , respectively.

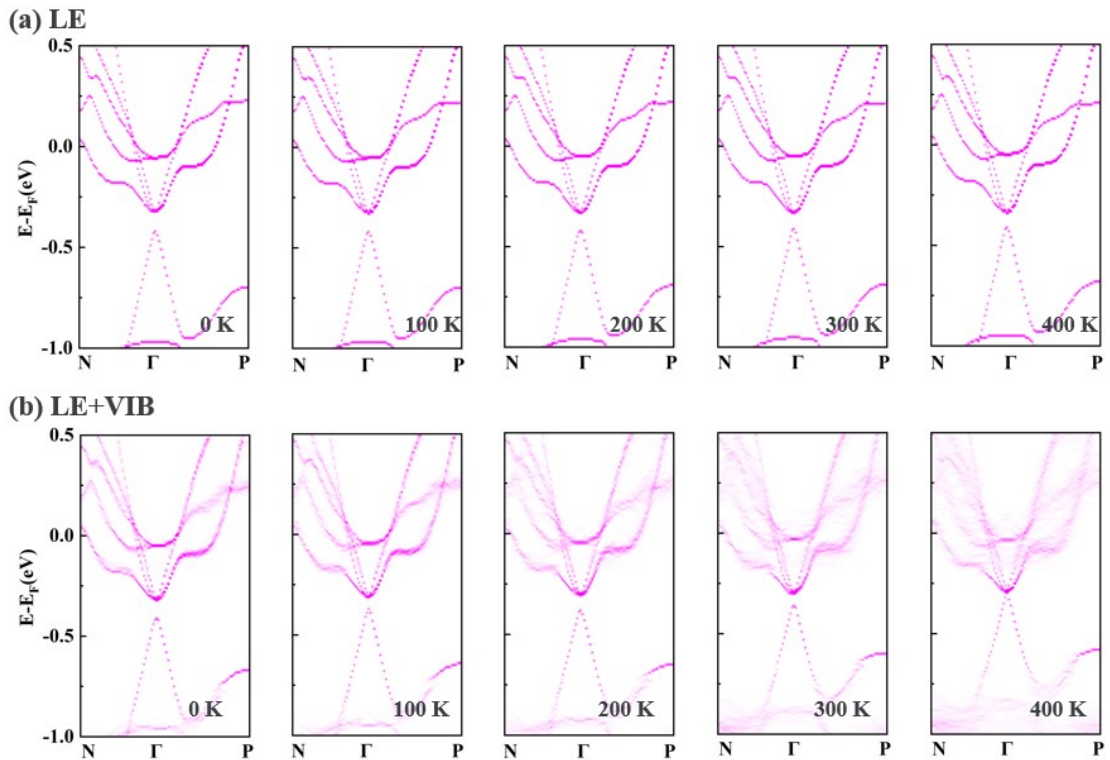

**Fig. S7** Effective band structures (EBSs) of  $\text{BaCo}_4\text{Sb}_{12}$  at different temperatures. (a) The effect of lattice expansion (LE) is only included. (b) The effects of lattice expansion and phonon-induced atomic vibrations are both included (LE + VIB). The high-symmetry  $\mathbf{k}$ -points are  $\Gamma$  (0 0 0),  $\text{N}$  (0 0 0.5) and  $\text{P}$  (0.25 0.25 0.25).

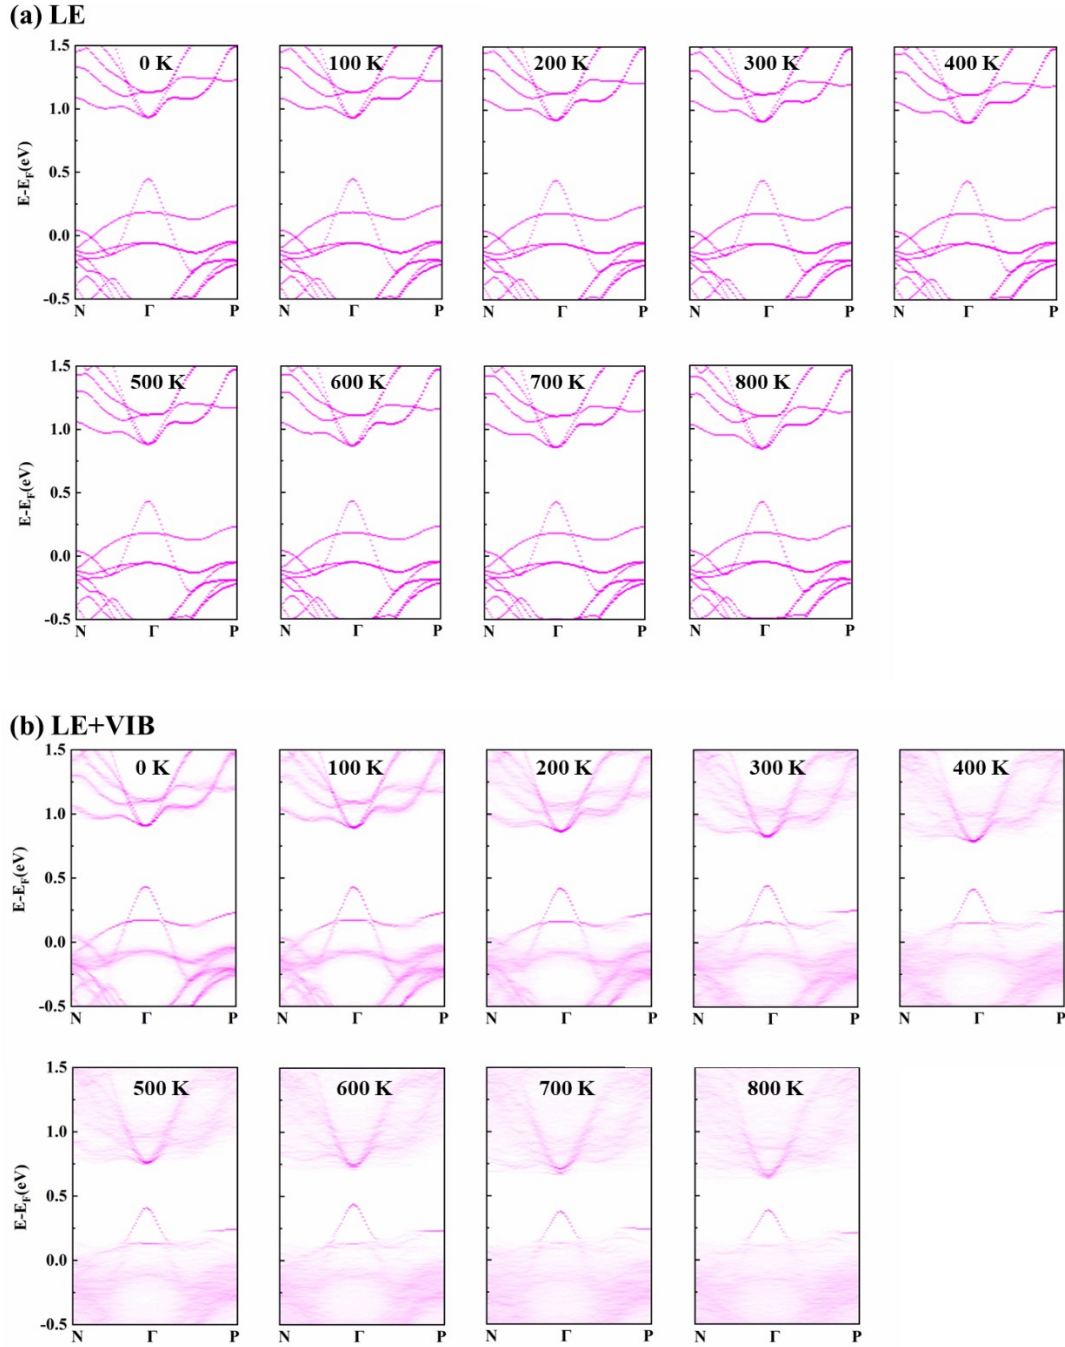

**Fig. S8** Effective band structures (EBSs) of  $\text{BaFe}_4\text{Sb}_{12}$  at different temperatures. (a) The effect of lattice expansion is only included (LE). (b) The effects of lattice expansion and phonon-induced atomic vibrations are both included (LE + VIB). The high-symmetry  $\mathbf{k}$ -points are  $\Gamma$  (0 0 0),  $\mathbf{N}$  (0 0 0.5) and  $\mathbf{P}$  (0.25 0.25 0.25).

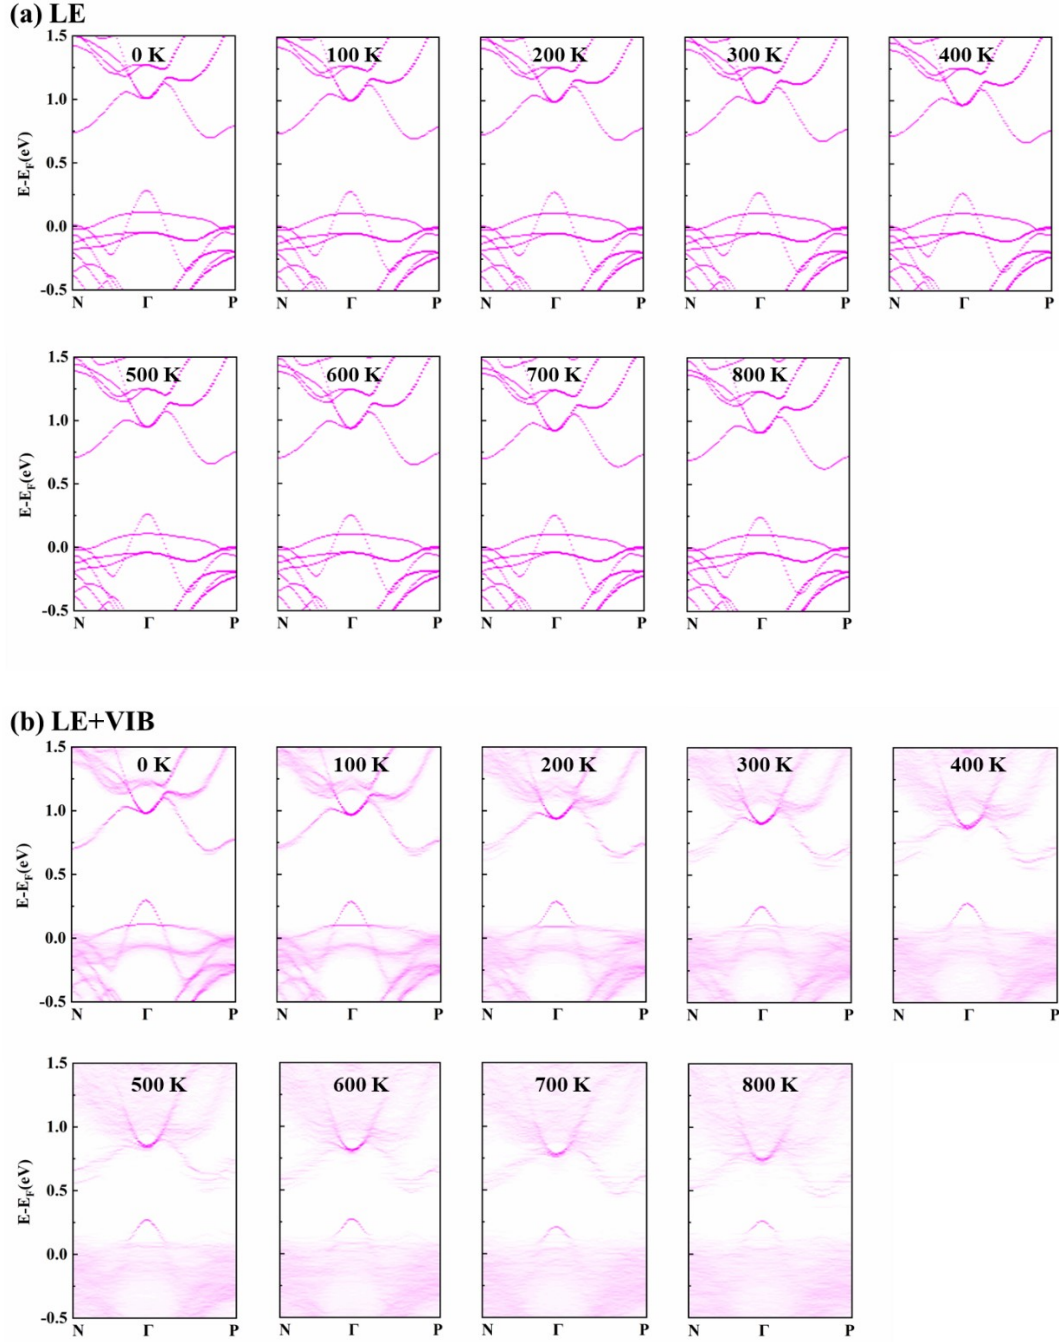

**Fig. S9** Effective band structures (EBSs) of  $\text{YbFe}_4\text{Sb}_{12}$  at different temperatures. (a) The effect of lattice expansion is only included (LE). (b) The effects of lattice expansion and phonon-induced atomic vibrations are both included (LE + VIB). The high-symmetry  $\mathbf{k}$ -points are  $\Gamma$  (0 0 0),  $\mathbf{N}$  (0 0 0.5) and  $\mathbf{P}$  (0.25 0.25 0.25).

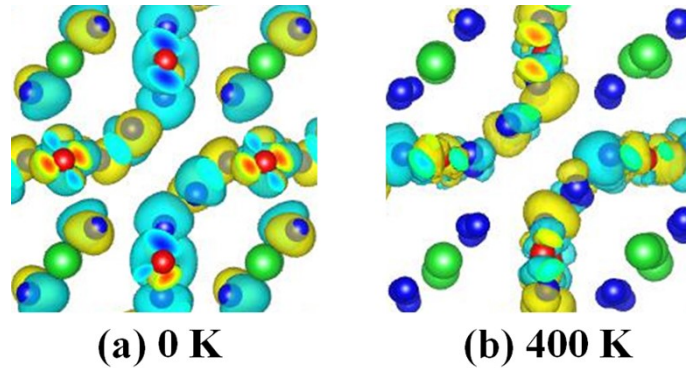

**Fig. S10** (a) and (b) are the wave functions of CBM in  $\text{BaFe}_4\text{Sb}_{12}$  at 0 K and 400 K, respectively. The green, red and blue balls represent the Ba, Fe, and Sb atoms, respectively.

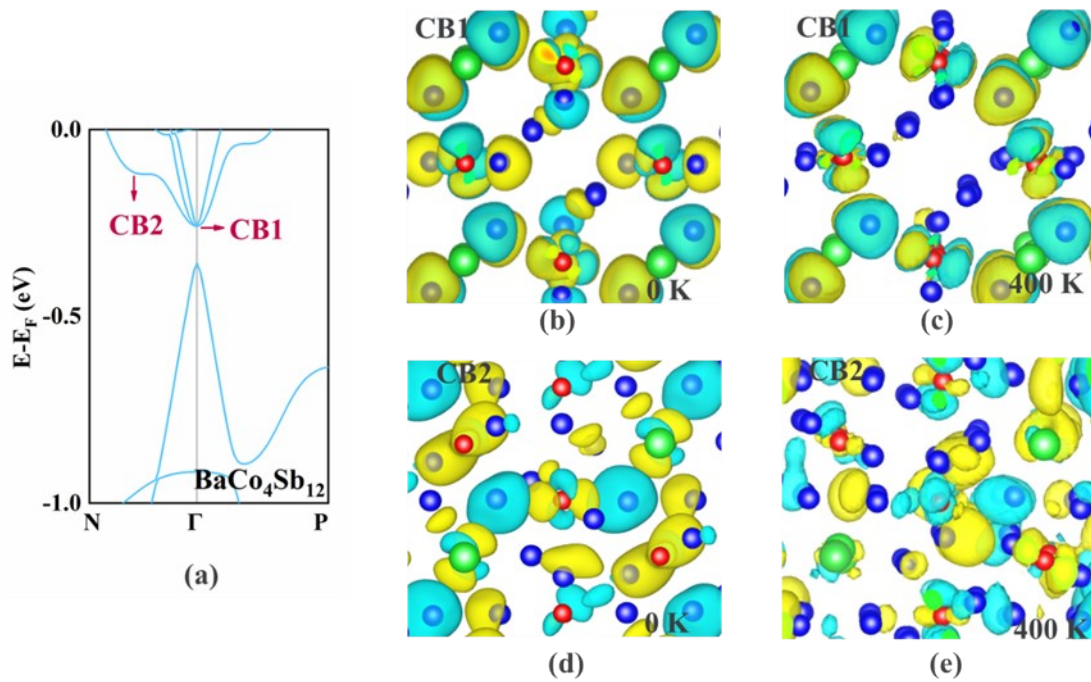

**Fig. S11** (a) Band structure of primitive cell of  $\text{BaCo}_4\text{Sb}_{12}$ . (b) and (c) are the wave functions of CB1 at 0 K and 400 K, respectively. (d) and (e) are the wave functions of CB2 at 0 K and 400 K, respectively. The green, red and blue balls represent the Ba, Co, and Sb atoms, respectively.



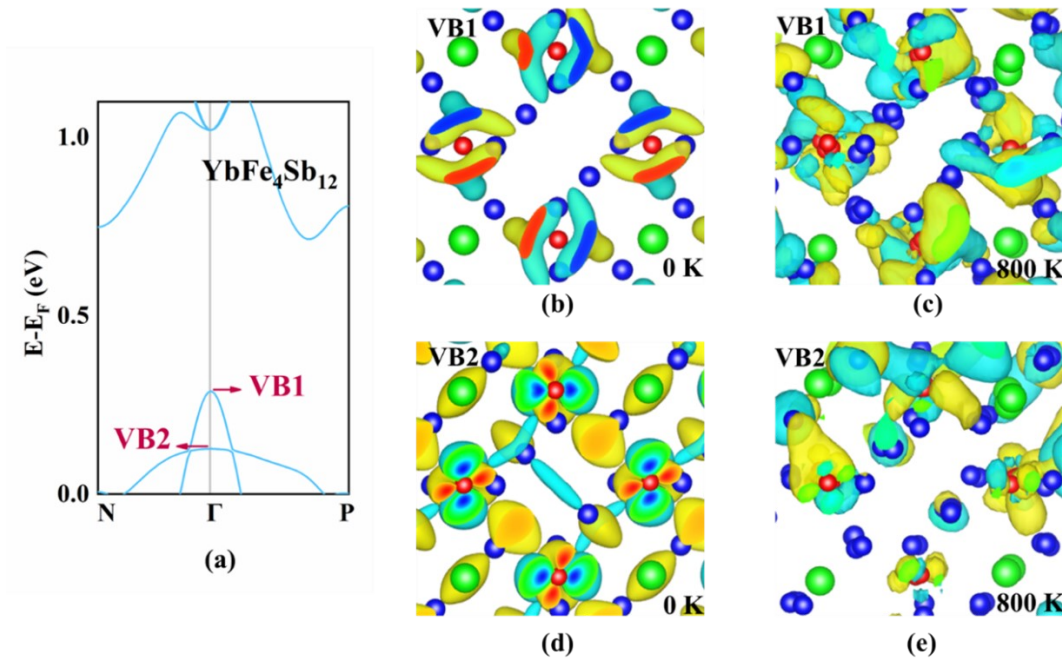

**Fig. S12** (a) Band structure of primitive cell of  $\text{YbFe}_4\text{Sb}_{12}$ . (b) and (c) are the wave functions of VB1 at 0 K and 800 K, respectively. (d) and (e) are the wave functions of VB2 at 0 K and 800 K, respectively. The green, red and blue balls represent the Yb, Fe, and Sb atoms, respectively.

**Table S1** Bond length (in Å) of Sb–Sb and Fe/Co–Sb and volume (in Å<sup>3</sup>) for these three skutterudites in optimized primitive cells. The variation (in Å) and the rate of change compared with  $\text{CoSb}_3$  are also presented. Bond length of Sb–Sb and Co–Sb in  $\text{CoSb}_3$  is 2.9716 Å and 2.5377 Å, respectively, the volume of  $\text{CoSb}_3$  is 377.86 Å<sup>3</sup>, from Chem. Mater., 2021, 33, 1046.

|                               | Sb–Sb  | Variation | Rate  | Fe/Co–Sb | Variation | Rate  | Volume | Rate  |
|-------------------------------|--------|-----------|-------|----------|-----------|-------|--------|-------|
| $\text{BaCo}_4\text{Sb}_{12}$ | 3.0014 | 0.0298    | 1.00% | 2.5817   | 0.0440    | 1.73% | 395.69 | 4.72% |
| $\text{BaFe}_4\text{Sb}_{12}$ | 3.0194 | 0.0478    | 1.61% | 2.5711   | 0.0334    | 1.32% | 393.98 | 4.27% |
| $\text{YbFe}_4\text{Sb}_{12}$ | 3.0149 | 0.0433    | 1.46% | 2.5479   | 0.0102    | 0.40% | 385.76 | 2.09% |

**Table S2** Bond length (in Å) of Sb–Sb and Fe/Co–Sb for the four skutterudites' supercells at 0 K, and 800 K with only lattice expansion considered. The variation (in Å) and the rate of change are also presented. The corresponding data of  $\text{CoSb}_3$  are from Chem. Mater., 2021, 33, 1046.

|                               | Sb–Sb  |        |           |       | Fe/Co–Sb |        |           |       |
|-------------------------------|--------|--------|-----------|-------|----------|--------|-----------|-------|
|                               | 0 K    | 800 K  | Variation | Rate  | 0 K      | 800 K  | Variation | Rate  |
| $\text{CoSb}_3$               | 2.9728 | 2.9983 | 0.0255    | 0.86% | 2.5396   | 2.5627 | 0.0231    | 0.91% |
| $\text{BaCo}_4\text{Sb}_{12}$ | 3.0067 | 3.0363 | 0.0296    | 0.98% | 2.5858   | 2.6093 | 0.0235    | 0.91% |
| $\text{BaFe}_4\text{Sb}_{12}$ | 3.0232 | 3.0539 | 0.0307    | 1.02% | 2.5750   | 2.5980 | 0.023     | 0.89% |
| $\text{YbFe}_4\text{Sb}_{12}$ | 3.0195 | 3.0530 | 0.0335    | 1.11% | 2.5515   | 2.5749 | 0.0234    | 0.92% |



**Table S3** Band gaps (in eV) of BaCo<sub>4</sub>Sb<sub>12</sub>, BaFe<sub>4</sub>Sb<sub>12</sub> and YbFe<sub>4</sub>Sb<sub>12</sub> at different temperatures, respectively. These values are extracted from the EBSs. LE means the EPR effect including only lattice expansion, and LE + VIB means the EPR effect including both lattice expansion and vibrations. The values of ZPR for BaCo<sub>4</sub>Sb<sub>12</sub>, BaFe<sub>4</sub>Sb<sub>12</sub> and YbFe<sub>4</sub>Sb<sub>12</sub> are 0.008 eV, 0.013 eV and 0.011 eV, respectively.

| Temperature<br>(K) | BaCo <sub>4</sub> Sb <sub>12</sub> |        | BaFe <sub>4</sub> Sb <sub>12</sub> |        | YbFe <sub>4</sub> Sb <sub>12</sub> |        |
|--------------------|------------------------------------|--------|------------------------------------|--------|------------------------------------|--------|
|                    | LE                                 | LE+VIB | LE                                 | LE+VIB | LE                                 | LE+VIB |
| 0                  | 0.106                              | 0.098  | 0.489                              | 0.476  | 0.407                              | 0.396  |
| 100                | 0.097                              | 0.062  | 0.487                              | 0.464  | 0.412                              | 0.361  |
| 200                | 0.089                              | 0.069  | 0.480                              | 0.443  | 0.409                              | 0.343  |
| 300                | 0.078                              | 0.057  | 0.465                              | 0.379  | 0.407                              | 0.322  |
| 400                | -                                  | -      | 0.451                              | 0.373  | 0.406                              | 0.272  |
| 500                | -                                  | -      | 0.446                              | 0.351  | 0.391                              | 0.239  |
| 600                | -                                  | -      | 0.439                              | 0.299  | 0.389                              | 0.231  |
| 700                | -                                  | -      | 0.428                              | 0.296  | 0.387                              | 0.248  |
| 800                | -                                  | -      | 0.406                              | 0.254  | 0.381                              | 0.195  |
